# Supplementary material for: Life cycle assessment of an industrial dishwasher produced in Italy: Identifying the main contributions to environmental impact
Source: Research Square preprint supplement (doi:10.21203/rs.3.rs-6981176/v1), 2025-07-14
Supplement: Supplementary file 1 [file ba570235310c517b85f6e868.docx]

Internal transport by road

Assembly

A

Welding

Folding

Purchase of stainless steel

Laser cutting

Acquisition of other components from external suppliers

Final assembly

Functional test

Regulatory test

Shipment preparation

Transport to the end customer

Use

End of Life

Machining of stainless steel


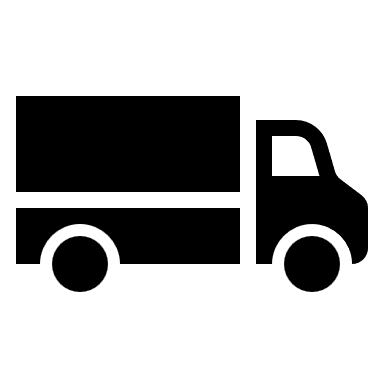

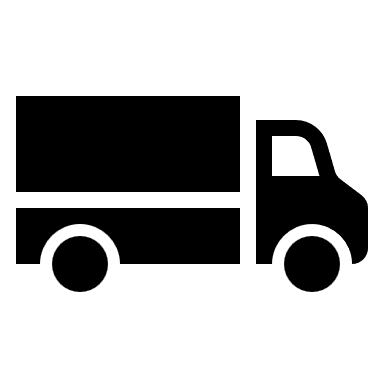


Supplier processing


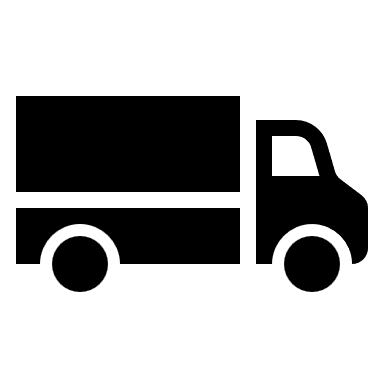


Post-Production

End of Life

Use

**System boundaries**

Pre-Production Production

Production

Figure 1: System boundaries

Figure 2: Final results comparing the first four phases

Figure 3: Details of the dishwasher parts disposal

Figure 4: Details of the use phase

Figure 5: Electrical energy consumption during the use phase

Figure 6: Details of the components in the pre-production phase

Figure 7: Details of the materials in the pre-production phase

Figure 8: Details of the production phase

Figure S1: Pre-production environmental impact
